# Supplementary material for: Clinical impact of vivax malaria: A collection review
Source: PLOS journal article supplement (doi:10.1371/journal.pmed.1003890), 2022-01-18
Supplement: S1 (10.1371/journal.pmed.1003890.s001) [file journal.pmed.1003890.s001]

**Figure S1. PRISMA flow chart for severe vivax malaria review**

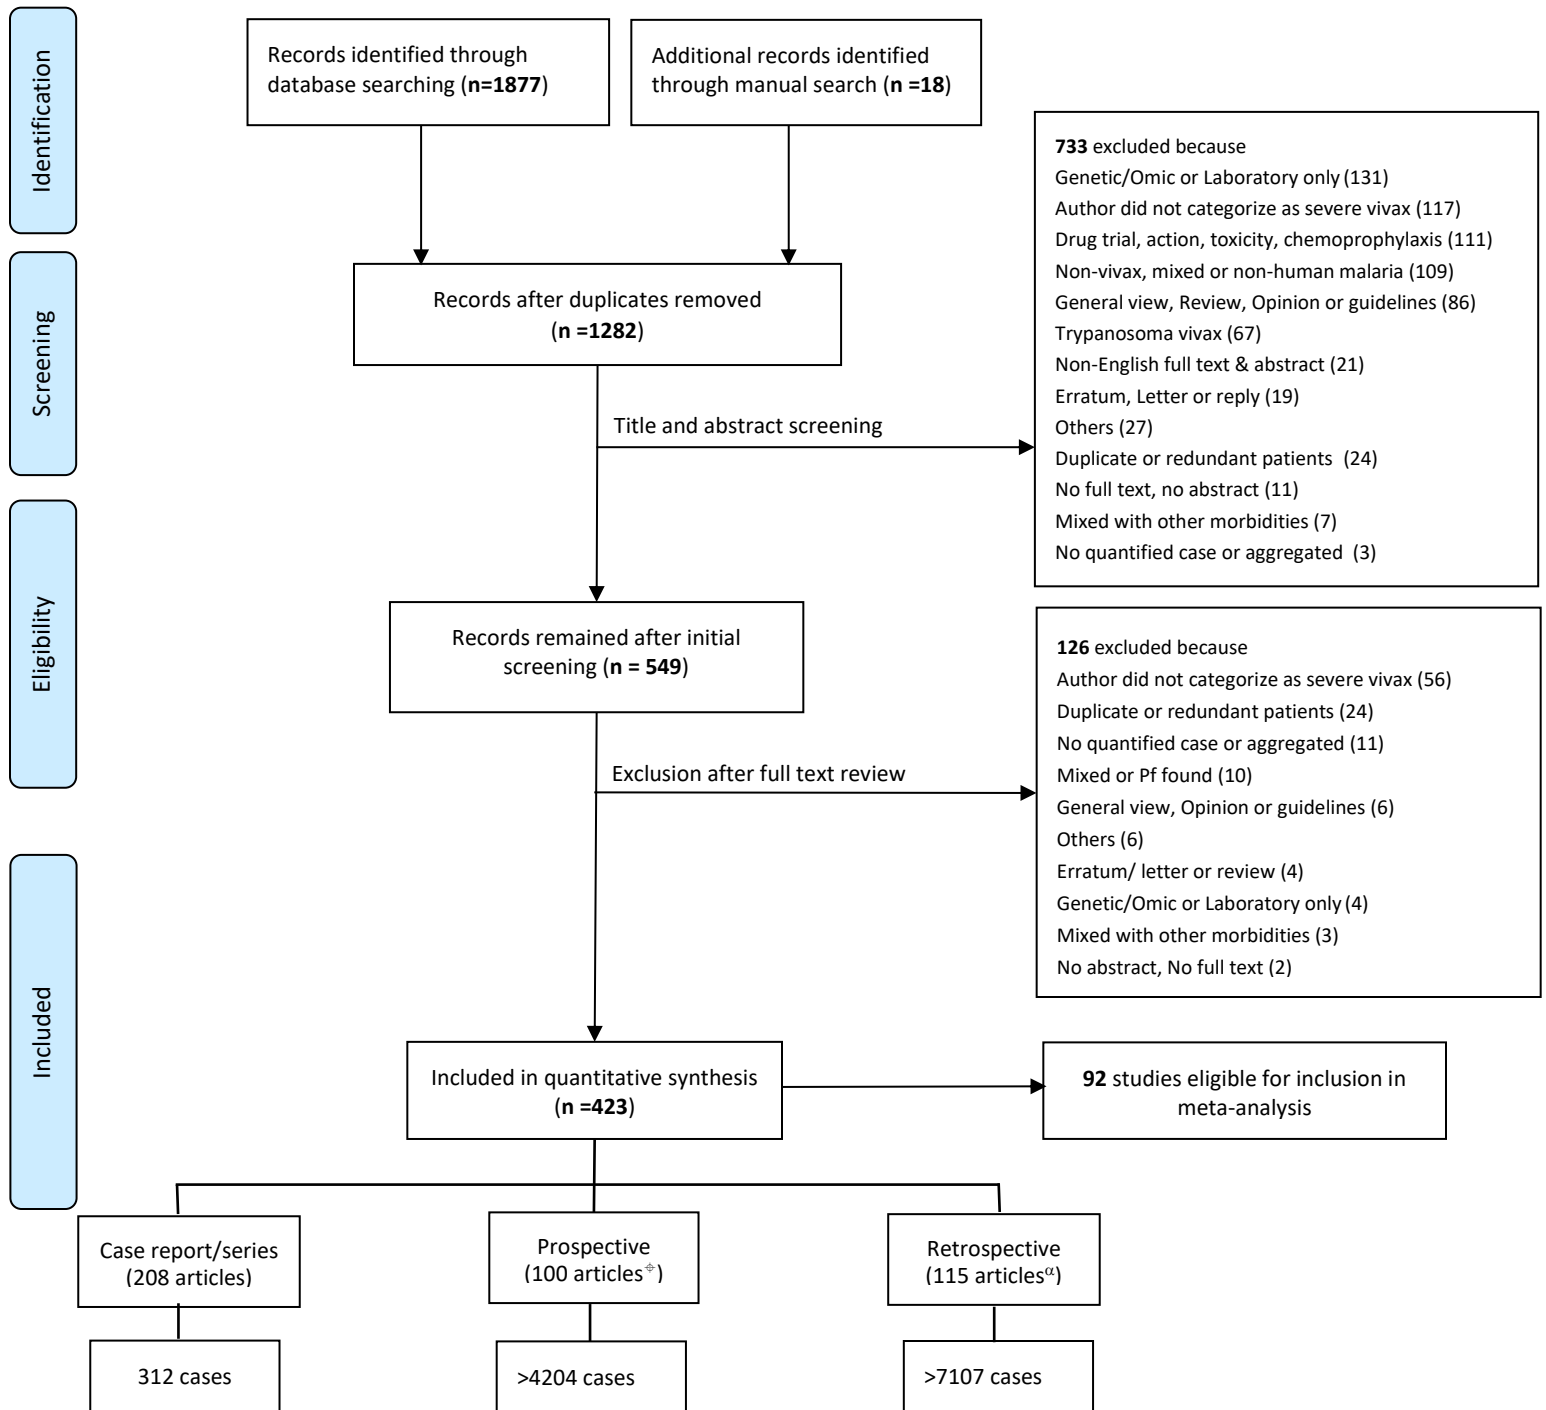

3<sup>‡</sup>, 8<sup>α</sup> with unquantified number of severe patients (complications only)
